# Supplementary material for: Keratinocyte growth factor impairs human thymic recovery from lymphopenia
Source: PubMed Central journal article supplement (PMC6629095; doi:10.1172/jci.insight.125377), 2019-06-20
Supplement: jciinsight-4-125377-s184.pdf [file jciinsight-4-125377-s184.pdf]

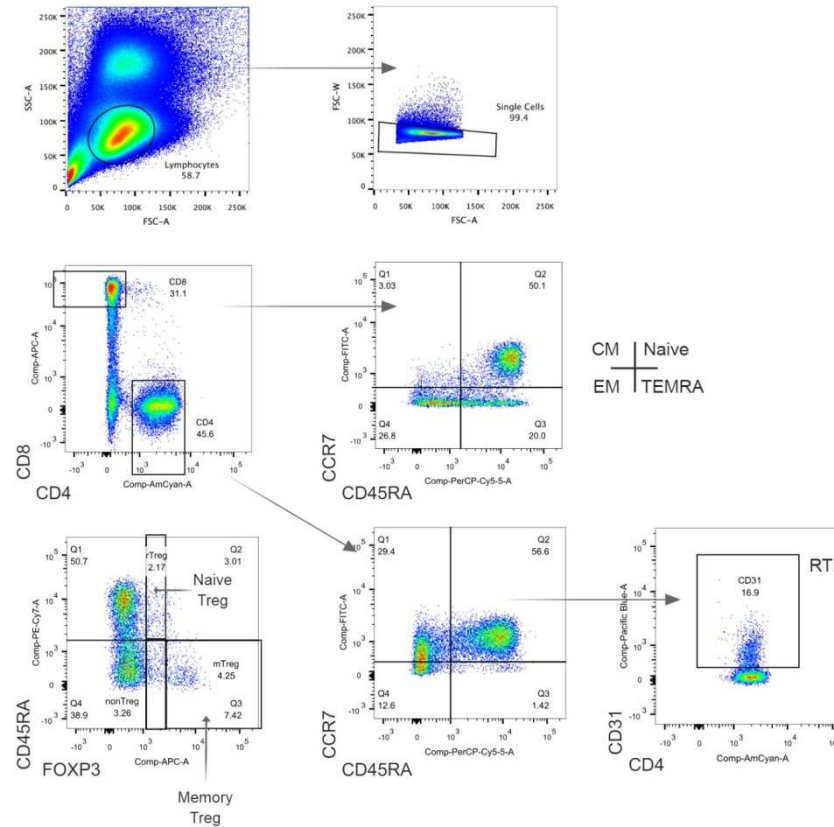

**Supplemental Figure 1:** Flow cytometry gating strategy. After gating on single lymphocytes CD4 and CD8 T-cells were divided into naïve, central memory (CM), effector memory (EM) and TEMRA populations based on CCR7 and CD45RA expression (naïve CCR7+CD45RA+; CM CCR7+CD45RA-, EM CCR7-CD45RA- and TEMRA CCR7-CD45RA+). The CD4 naïve (CCR7+CD45RA+) population was further split into recent thymic emigrants (RTEs) and non-RTEs based on expression of CD31 (RTE CD4+CCR7+CD45RA+CD31+). CD4 T regulatory cells (Tregs) were divided into naïve and memory subpopulations based on CD45RA and FOXP3 expression (naïve Tregs CD4+CD45RA+FOXP3+; memory Tregs CD4+CD45RA-FOXP3++).

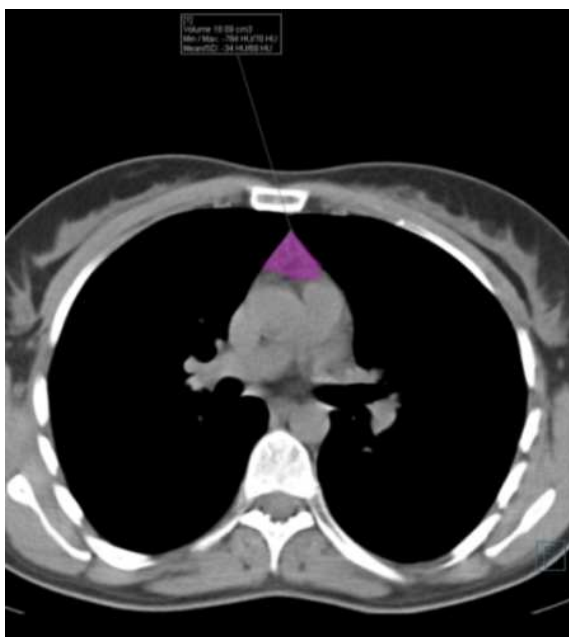

**Supplemental Figure 2:** Example of CT Chest Imaging – showing the thymus in the anterior mediastinum, with the superimposed region of interest volume tool (purple).

| Variable                                             | Group      | Statistic          | Screening       | Baseline        | M1              | M3              | M6              |
|------------------------------------------------------|------------|--------------------|-----------------|-----------------|-----------------|-----------------|-----------------|
| Sample Numbers                                       | Placebo    | Total Cell count n | 14              | 14              | 10              | 14              | 14              |
|                                                      | Palifermin |                    | 14              | 14              | 8               | 14              | 14              |
|                                                      | Placebo    | % count n          | 14              | 13              | 14              | 14              | 14              |
|                                                      | Palifermin |                    | 14              | 13              | 14              | 14              | 14              |
|                                                      | Placebo    | Subset count n     | 14              | 13              | 10              | 14              | 14              |
|                                                      | Palifermin |                    | 14              | 13              | 8               | 14              | 14              |
| Total CD4 Count (x10 <sup>9</sup> /L)                | Placebo    | Mean (SD)          | 0.8907 (0.2774) | 0.9786 (0.3633) | 0.0500 (0.0492) | 0.0757 (0.0390) | 0.1493 (0.0664) |
|                                                      |            | Median             | 0.855           | 0.855           | 0.03            | 0.08            | 0.145           |
|                                                      |            | Min, Max           | 0.46, 1.32      | 0.68, 1.97      | 0, 0.14         | 0.03, 0.15      | 0.06, 0.31      |
|                                                      | Palifermin | Mean (SD)          | 0.8043 (0.2981) | 0.8643 (0.3559) | 0.0825 (0.1853) | 0.0929 (0.0932) | 0.1064 (0.0551) |
|                                                      |            | Median             | 0.79            | 0.895           | 0.015           | 0.065           | 0.085           |
|                                                      |            | Min, Max           | 0.38, 1.38      | 0.35, 1.74      | 0, 0.54         | 0.03, 0.35      | 0.04, 0.25      |
| % of CD4 that are naïve (CCR7+CD45RA+)               | Placebo    | Mean (SD)          | 59.61 (14.28)   | 60.30 (14.60)   | 8.69 ( 9.89)    | 17.88 (15.93)   | 48.36 (22.24)   |
|                                                      |            | Median             | 61.55           | 61.6            | 4.47            | 12.975          | 55.35           |
|                                                      |            | Min, Max           | 37.4, 85.7      | 26, 80.9        | 0.81, 31.6      | 0.3, 53.5       | 2.29, 78.6      |
|                                                      | Palifermin | Mean (SD)          | 47.52 (15.36)   | 48.61 (17.19)   | 3.21 ( 3.41)    | 6.19 ( 9.78)    | 23.42 (18.77)   |
|                                                      |            | Median             | 50.9            | 45.9            | 2               | 2.405           | 22.45           |
|                                                      |            | Min, Max           | 23.5, 72.4      | 23.8, 78.6      | 0, 11.2         | 0.086, 37.1     | 0.21, 51.8      |
| Naïve CD4 (CCR7+CD45RA+) count (x10 <sup>7</sup> /L) | Placebo    | Mean (SD)          | 53.869 (22.245) | 59.777 (26.108) | 0.341 ( 0.252)  | 1.326 ( 1.293)  | 7.733 ( 5.473)  |
|                                                      |            | Median             | 52.561          | 56.63           | 0.3092          | 1.0904          | 6.929           |
|                                                      |            | Min, Max           | 18.538, 90.52   | 19.24, 121.155  | 0, 0.67         | 0.009, 4.28     | 0.1603, 19.933  |
|                                                      | Palifermin | Mean (SD)          | 39.726 (21.395) | 44.333 (23.646) | 0.036 ( 0.038)  | 0.387 ( 0.677)  | 2.229 ( 1.997)  |
|                                                      |            | Median             | 34.9265         | 45.126          | 0.02485         | 0.15195         | 1.357           |
|                                                      |            | Min, Max           | 10.906, 77.556  | 9.996, 79.866   | 0, 0.1114       | 0.0224, 2.597   | 0.0189, 6.108   |
| % of CD4 that are RTEs (CD31+CCR7+CD45RA+)           | Placebo    | Mean (SD)          | 29.86 (13.29)   | 30.31 (11.57)   | 7.93 ( 8.71)    | 13.29 (11.75)   | 33.95 (18.68)   |
|                                                      |            | Median             | 27.9            | 34.5            | 4.105           | 9.88            | 32.75           |
|                                                      |            | Min, Max           | 11, 59.6        | 10.3, 48.4      | 0.73, 28.9      | 0.17, 38.9      | 0.85, 63        |
|                                                      | Palifermin | Mean (SD)          | 21.32 ( 9.45)   | 26.44 (12.83)   | 2.94 ( 2.77)    | 4.83 ( 7.88)    | 16.05 (13.21)   |
|                                                      |            | Median             | 19.85           | 24.8            | 2.26            | 1.89            | 14.7            |
|                                                      |            | Min, Max           | 9.03, 40.3      | 10.2, 48.9      | 0.034, 11       | 0.079, 29.8     | 0.54, 37.1      |
| RTEs (CD31+CCR7+CD45RA+) count (x10 <sup>7</sup> /L) | Placebo    | Mean (SD)          | 13.005 ( 7.696) | 15.292 (10.371) | 3.316 ( 9.004)  | 1.336 ( 2.181)  | 5.029 ( 7.011)  |
|                                                      |            | Median             | 12.348          | 12.74           | 0.398           | 0.8859          | 3.688           |
|                                                      |            | Min, Max           | 2.66, 27.951    | 3.09, 41.34     | 0, 28.9         | 0, 8.507        | 0.0085, 28.567  |
|                                                      | Palifermin | Mean (SD)          | 8.896 ( 4.239)  | 13.229 ( 8.722) | 0.115 ( 0.146)  | 0.238 ( 0.321)  | 1.317 ( 1.282)  |
|                                                      |            | Median             | 8.7775          | 13.184          | 0.05145         | 0.08847         | 0.9             |
|                                                      |            | Min, Max           | 2.7993, 16.523  | 2.144, 33.25    | 0, 0.3861       | 0.006, 1.023    | 0.1242, 4.83    |
| % of CD4 that are CM (CCR7+CD45RA-)                  | Placebo    | Mean (SD)          | 26.2 (11.95)    | 25.1 (11.25)    | 14.9 (12.31)    | 17.3 ( 7.15)    | 18.5 ( 8.96)    |
|                                                      |            | Median             | 25              | 23.9            | 10.8            | 16.7            | 17.35           |
|                                                      |            | Min, Max           | 2.38, 46.4      | 0.81, 46.6      | 1.11, 48.3      | 4.27, 33.4      | 1.64, 36.3      |
|                                                      | Palifermin | Mean (SD)          | 30.2 ( 7.16)    | 28.8 ( 7.27)    | 21.4 (13.79)    | 16.6 (10.09)    | 21.7 ( 9.21)    |

|                                                                   |            |                                 |                                             |                                            |                                      |                                          |                                            |
|-------------------------------------------------------------------|------------|---------------------------------|---------------------------------------------|--------------------------------------------|--------------------------------------|------------------------------------------|--------------------------------------------|
|                                                                   |            | Median<br>Min, Max              | 29.1<br>20, 45.5                            | 29.3<br>14.5, 42.7                         | 18.1<br>2.06, 56.6                   | 17.65<br>1.81, 36.1                      | 24.5<br>5.32, 36                           |
| <b>CM CD4 (CCR7+CD45RA-)<br/>count (x10<sup>7</sup>/L)</b>        | Placebo    | Mean (SD)<br>Median<br>Min, Max | 22.683 ( 9.464)<br>22.365<br>1.2614, 40.392 | 24.458 (11.432)<br>24.182<br>0.567, 42.946 | 0.616 ( 0.674)<br>0.377<br>0, 1.932  | 1.335 ( 0.799)<br>1.344<br>0.1281, 3.006 | 2.694 ( 1.526)<br>2.5045<br>0.0984, 6.897  |
|                                                                   | Palifermin | Mean (SD)<br>Median<br>Min, Max | 24.617 (11.528)<br>23.61<br>9.156, 49.595   | 25.849 (14.258)<br>24.411<br>8.19, 52.548  | 0.430 ( 0.332)<br>0.403<br>0, 1.1124 | 1.123 ( 0.617)<br>1.398<br>0.0932, 1.88  | 2.094 ( 0.959)<br>2.1235<br>0.3584, 3.904  |
| <b>% of CD4 that are EM<br/>(CCR7-CD45RA-)</b>                    | Placebo    | Mean (SD)<br>Median<br>Min, Max | 12.1 ( 6.65)<br>11.55<br>1.67, 26.2         | 12.1 ( 7.25)<br>9.66<br>0.84, 26.2         | 64.3 (21.63)<br>70.75<br>4.27, 85.3  | 56.4 (21.18)<br>60.3<br>12.6, 83.4       | 27.5 (21.33)<br>20.8<br>5.72, 71.1         |
|                                                                   | Palifermin | Mean (SD)<br>Median<br>Min, Max | 19.5 ( 9.77)<br>16.05<br>6.49, 38.9         | 19.2 (11.24)<br>19.1<br>5.66, 39           | 66.4 (14.47)<br>65.55<br>39.8, 96.4  | 67.9 (17.04)<br>74.35<br>29.7, 84.6      | 45.8 (19.97)<br>45.45<br>17.1, 75.2        |
| <b>EM CD4 (CCR7-CD45RA-)<br/>count (x10<sup>7</sup>/L)</b>        | Placebo    | Mean (SD)<br>Median<br>Min, Max | 10.89 ( 7.30)<br>9.9209<br>0.8851, 28.82    | 12.33 ( 9.01)<br>10.1926<br>0.588, 30.732  | 3.66 ( 4.40)<br>1.452<br>0, 11.718   | 4.39 ( 2.88)<br>3.616<br>0.378, 9.698    | 3.89 ( 3.00)<br>3.184<br>0.3432, 10.849    |
|                                                                   | Palifermin | Mean (SD)<br>Median<br>Min, Max | 14.40 ( 5.85)<br>14.042<br>3.4272, 24.035   | 15.22 ( 9.29)<br>13.65<br>3.8976, 39.324   | 7.60 (17.99)<br>1.0295<br>0, 52.056  | 6.08 ( 5.86)<br>4.206<br>2.079, 21.97    | 4.97 ( 4.35)<br>3.998<br>1.791, 18.8       |
| <b>% of CD4 that are<br/>TEMRA (CCR7-CD45RA+)</b>                 | Placebo    | Mean (SD)<br>Median<br>Min, Max | 2.07 ( 2.61)<br>1.425<br>0.095, 10.2        | 2.55 ( 4.58)<br>1.28<br>0.2, 17.5          | 12.13 (15.41)<br>8.435<br>2.79, 63   | 8.40 (10.98)<br>4.805<br>0, 43.6         | 5.64 (10.76)<br>2.295<br>1.1, 42.7         |
|                                                                   | Palifermin | Mean (SD)<br>Median<br>Min, Max | 2.76 ( 3.30)<br>1.165<br>0.54, 10.2         | 3.39 ( 4.21)<br>1.41<br>0.66, 12.4         | 9.00 ( 8.32)<br>6.38<br>1.2, 26.7    | 9.30 (12.85)<br>5.21<br>1.09, 51         | 9.16 (16.47)<br>3.425<br>0.68, 64.6        |
| <b>TEMRA CD4<br/>(CCR7+CD45RA+) count<br/>(x10<sup>7</sup>/L)</b> | Placebo    | Mean (SD)<br>Median<br>Min, Max | 1.638 (1.641)<br>1.2433<br>0.07505, 5.406   | 2.203 (3.206)<br>1.5192<br>0.1725, 12.25   | 0.388 (0.355)<br>0.3325<br>0, 1.26   | 0.522 (0.425)<br>0.435<br>0, 1.308       | 0.611 (0.633)<br>0.46875<br>0.077, 2.562   |
|                                                                   | Palifermin | Mean (SD)<br>Median<br>Min, Max | 1.704 (1.494)<br>1.06615<br>0.252, 5.304    | 2.074 (1.922)<br>1.1875<br>0.6204, 7.192   | 0.182 (0.277)<br>0.0819<br>0, 0.8316 | 1.699 (4.684)<br>0.29<br>0.0763, 17.85   | 1.352 (3.087)<br>0.28695<br>0.0544, 11.628 |

**Supplemental Table 1:** Characterisation of the CD4 population into naïve (CD45RA+CCR7+), central memory (CD45RA-CCR7+), effector memory (CD45RA-CCR7-) and TEMRA (CD45RA+CCR7-) subsets. Data show either cell subset count or percentage of the total CD4+ T cell population. Data show: mean (SD), median and minimum and maximum values.

| <b>Variable</b>                   | <b>Estimate</b> | <b>95% confidence interval</b> | <b>p-value</b> |
|-----------------------------------|-----------------|--------------------------------|----------------|
| Intercept                         | 5.294           | 0.948, 9.64                    | 0.027          |
| Treatment: Placebo vs. Palifermin | -5.132          | -8.3, -1.964                   | 0.005          |
| Age (years)                       | -0.151          | -0.353, 0.051                  | 0.158          |
| Baseline Naïve CD4+ T-cell count  | 0.051           | -0.016, 0.118                  | 0.154          |
| Total Placebo/Palifermin dose     | 0.011           | -0.033, 0.055                  | 0.621          |

**Supplemental Table 2:** Results of multivariate linear regression. Where age, baseline naïve CD4 count and total Palifermin dose are median-centred, the intercept represents the estimated naïve CD4 T-cell count at 6 months for a 31 year old patient receiving Placebo, with a baseline CD4 T-cell count of 4 and a total Palifermin dose of 155mg.

| Variable              | Group                   | Statistic                | Screening                | Baseline                 | M3                       | M6              |
|-----------------------|-------------------------|--------------------------|--------------------------|--------------------------|--------------------------|-----------------|
| TREC <sub>s</sub> /mL | Placebo                 | n                        | 14                       | 14                       | 14                       | 14              |
|                       |                         | Mean (SD)                | 14498.2 (10500.8)        | 11650.6 (10804.1)        | 846.1 (1980.6)           | 3395.5 (3038.8) |
|                       |                         | Median                   | 12145.767175             | 8508.5298895             | 162.92944065             | 2900.9870755    |
|                       | Min, Max                | 2182.447437, 44661.9694  | 2012.348712, 45769.11665 | 49.93802302, 7530.082989 | 56.82513607, 10497.06299 |                 |
|                       | Palifermin              | n                        | 14                       | 13                       | 14                       | 14              |
|                       |                         | Mean (SD)                | 11567.4 (8593.3)         | 6735.9 (4055.6)          | 64.6 (27.9)              | 1100.1 (1721.6) |
| Median                |                         | 9802.973622              | 5855.968675              | 54.636672535             | 130.4216061              |                 |
| Min, Max              | 1720.08455, 30307.69819 | 2235.920272, 15441.01851 | 42.2178011, 150.4546818  | 25.34423421, 5179.969108 |                          |                 |

**Supplemental Table 3:** T cell receptor circles/mL of blood. Data show: n, mean (SD), median, minimum and maximum values (range).

| Variable                             | Group      | Statistic                       | Screening                                                | M6                                                        |
|--------------------------------------|------------|---------------------------------|----------------------------------------------------------|-----------------------------------------------------------|
| Sample Numbers                       | Placebo    | n                               | 13                                                       | 14                                                        |
|                                      | Palifermin | n                               | 14                                                       | 14                                                        |
| CD4 Clonality                        | Placebo    | Mean (SD)<br>Median<br>Min, Max | 0.0375 (0.00781)<br>0.03585857<br>0.03017301, 0.05763811 | 0.0669 (0.03475)<br>0.054343265<br>0.03364677, 0.14011244 |
|                                      | Palifermin | Mean (SD)<br>Median<br>Min, Max | 0.0638 (0.07221)<br>0.04150275<br>0.03352844, 0.31023574 | 0.1022 (0.08390)<br>0.079028835<br>0.03899742, 0.3464845  |
| CD4 Shannon's entropy                | Placebo    | Mean (SD)<br>Median<br>Min, Max | 15.2 (0.18)<br>15.139041<br>14.77885, 15.378655          | 13.3 (1.50)<br>13.712763<br>10.31376, 15.0130625          |
|                                      | Palifermin | Mean (SD)<br>Median<br>Min, Max | 14.6 (1.47)<br>15.07127225<br>9.58258, 15.196354         | 12.7 (2.09)<br>13.555009<br>8.372956, 14.92308            |
| Number of unique clones/ ug DNA      | Placebo    | Mean (SD)<br>Median<br>Min, Max | 139536 (13669)<br>141958<br>117395, 168923               | 84017 (36989)<br>93483.5<br>9743, 126215                  |
|                                      | Palifermin | Mean (SD)<br>Median<br>Min, Max | 123118 (27336)<br>129185<br>38020, 150158                | 75111 (29936)<br>84755<br>20999, 124700                   |
| Total frequency of top (%) 20 clones | Placebo    | Mean (SD)<br>Median<br>Min, Max | 1.37 ( 1.23)<br>0.90441766<br>0.51445915, 4.775824       | 5.00 ( 5.44)<br>2.527990275<br>0.68910601, 19.11048208    |
|                                      | Palifermin | Mean (SD)<br>Median<br>Min, Max | 4.86 ( 9.76)<br>1.64020026<br>0.66854091, 38.0358239     | 9.78 (10.98)<br>5.602800835<br>1.39888024, 39.84258683    |

**Supplemental Table 4:** CD4 clonality data. Data show: n, mean (SD), median, minimum and maximum values (range).

| Variable                             | Group      | Statistic                       | Screening                                              | M6                                                      |
|--------------------------------------|------------|---------------------------------|--------------------------------------------------------|---------------------------------------------------------|
| Sample Numbers                       | Placebo    | n                               | 13                                                     | 14                                                      |
|                                      | Palifermin | n                               | 14                                                     | 14                                                      |
| CD8 Clonality                        | Placebo    | Mean (SD)<br>Median<br>Min, Max | 0.136 (0.0721)<br>0.10035078<br>0.04902521, 0.25257745 | 0.172 (0.1273)<br>0.10737668<br>0.05752725, 0.40934533  |
|                                      | Palifermin | Mean (SD)<br>Median<br>Min, Max | 0.138 (0.0768)<br>0.10242532<br>0.06491759, 0.27877614 | 0.264 (0.1526)<br>0.2728574<br>0.07362837, 0.5184298    |
| CD8 Shannon's entropy                | Placebo    | Mean (SD)<br>Median<br>Min, Max | 13.11 (1.29)<br>13.44983<br>11.284007, 14.839041       | 10.90 (2.95)<br>11.64596375<br>3.4748309, 13.79748      |
|                                      | Palifermin | Mean (SD)<br>Median<br>Min, Max | 13.02 (1.40)<br>13.662123<br>10.533361, 14.5808325     | 9.48 (2.93)<br>9.8403895<br>5.365707, 13.506013         |
| Number of unique clones/ ug DNA      | Placebo    | Mean (SD)<br>Median<br>Min, Max | 94054 (25106)<br>94902.5<br>56125, 127720              | 46209 (26569)<br>39843.02607<br>9580, 95197.5           |
|                                      | Palifermin | Mean (SD)<br>Median<br>Min, Max | 89672 (21385)<br>88376.25<br>52742.5, 123575           | 30890 (25455)<br>24710<br>5650, 76360                   |
| Total frequency of top (%) 20 clones | Placebo    | Mean (SD)<br>Median<br>Min, Max | 13.8 ( 9.15)<br>8.92213444<br>3.37677901, 29.1517279   | 24.6 (23.32)<br>11.764251335<br>3.81559545, 81.99052133 |
|                                      | Palifermin | Mean (SD)<br>Median<br>Min, Max | 14.3 (10.19)<br>9.67576011<br>4.81115464, 32.95189837  | 35.6 (23.70)<br>31.433465595<br>6.91309173, 75.30927941 |

**Supplemental Table 5:** CD8 clonality data. Data show: n, mean (SD), median, minimum and maximum values (range).



| Variable                                             | Group      | Statistic          | Screening         | Baseline          | M1               | M3               | M6               |
|------------------------------------------------------|------------|--------------------|-------------------|-------------------|------------------|------------------|------------------|
| Sample Numbers                                       | Placebo    | Total Cell count n | 14                | 14                | 10               | 14               | 14               |
|                                                      | Palifermin |                    | 14                | 14                | 8                | 14               | 14               |
|                                                      | Placebo    | % count n          | 14                | 13                | 14               | 14               | 14               |
|                                                      | Palifermin |                    | 14                | 13                | 14               | 14               | 14               |
|                                                      | Placebo    | Subset count n     | 14                | 13                | 10               | 14               | 14               |
|                                                      | Palifermin |                    | 14                | 13                | 8                | 14               | 14               |
| Total CD8 Count (x10 <sup>9</sup> /L)                | Placebo    | Mean (SD)          | 0.4229 (0.180)    | 0.4979 (0.262)    | 0.2460 (0.337)   | 0.0957 (0.128)   | 0.1321 (0.131)   |
|                                                      |            | Median             | 0.385             | 0.42              | 0.045            | 0.06             | 0.095            |
|                                                      |            | Min, Max           | 0.19, 0.77        | 0.22, 1.06        | 0, 1             | 0, 0.47          | 0.01, 0.53       |
|                                                      | Palifermin | Mean (SD)          | 0.4443 (0.202)    | 0.5279 (0.326)    | 0.1500 (0.295)   | 0.1864 (0.328)   | 0.1743 (0.189)   |
|                                                      |            | Median             | 0.4               | 0.475             | 0.04             | 0.07             | 0.08             |
|                                                      |            | Min, Max           | 0.14, 0.93        | 0.16, 1.33        | 0, 0.87          | 0.01, 1.26       | 0.02, 0.68       |
| Percentage of CD8 that are naïve (CCR7+CD45RA+)      | Placebo    | Mean (SD)          | 50.72 (14.45)     | 46.92 (11.78)     | 7.47 (17.42)     | 17.86 (17.97)    | 37.19 (22.19)    |
|                                                      |            | Median             | 50.3              | 48.4              | 1.57             | 12.35            | 36.25            |
|                                                      |            | Min, Max           | 11.8, 68          | 24.2, 64.1        | 0, 67.1          | 0.34, 66.5       | 6.77, 64.9       |
|                                                      | Palifermin | Mean (SD)          | 44.69 (17.64)     | 40.67 (18.16)     | 1.87 ( 2.63)     | 13.30 (19.02)    | 23.70 (25.43)    |
|                                                      |            | Median             | 50.35             | 44.2              | 0.835            | 2.29             | 12.2             |
|                                                      |            | Min, Max           | 13.7, 65.8        | 9.87, 65.6        | 0, 9.83          | 0.069, 60.8      | 0.25, 67.8       |
| Naïve CD8 (CCR7+CD45RA+) count (x10 <sup>7</sup> /L) | Placebo    | Mean (SD)          | 19.9996 ( 7.4873) | 22.0470 (10.5024) | 6.8969 (21.1552) | 1.1369 ( 1.2838) | 4.1293 ( 3.4602) |
|                                                      |            | Median             | 20.1475           | 19.844            | 0.0852           | 0.615            | 4.0995           |
|                                                      |            | Min, Max           | 8.588, 31.647     | 7.986, 48.23      | 0, 67.1          | 0, 4.1172        | 0.0677, 14.204   |
|                                                      | Palifermin | Mean (SD)          | 19.0920 (10.0442) | 20.8392 (14.6189) | 0.0192 ( 0.0187) | 0.5113 ( 0.5548) | 1.5410 ( 1.5038) |
|                                                      |            | Median             | 20.424            | 20.992            | 0.01515          | 0.2631           | 0.74325          |
|                                                      |            | Min, Max           | 5.162, 41.344     | 1.5792, 58.786    | 0, 0.0522        | 0.00966, 1.824   | 0.0575, 5.12     |
| % of CD8 that are CM (CCR7+CD45RA-)                  | Placebo    | Mean (SD)          | 7.42 (6.24)       | 5.37 (5.40)       | 1.74 (1.65)      | 3.15 (3.56)      | 3.06 (2.75)      |
|                                                      |            | Median             | 5.99              | 2.75              | 1.535            | 2.235            | 2.145            |
|                                                      |            | Min, Max           | 0.087, 20.5       | 0.17, 17.6        | 0.19, 6.03       | 0, 13.4          | 0.24, 9.28       |
|                                                      | Palifermin | Mean (SD)          | 7.17 (3.54)       | 5.15 (3.56)       | 2.07 (2.61)      | 1.58 (1.73)      | 3.01 (4.40)      |
|                                                      |            | Median             | 6.795             | 3.08              | 1.005            | 1.13             | 1.975            |
|                                                      |            | Min, Max           | 3.4, 16           | 0.93, 13.7        | 0, 7.14          | 0.11, 6.32       | 0.15, 17.6       |
| CM CD8 (CCR7+CD45RA-) count (x10 <sup>7</sup> /L)    | Placebo    | Mean (SD)          | 6.1950 (4.8925)   | 5.3740 (6.3782)   | 0.0329 (0.0280)  | 0.2006 (0.1692)  | 0.4182 (0.3535)  |
|                                                      |            | Median             | 5.8579            | 3.08              | 0.0277           | 0.1694           | 0.2708           |
|                                                      |            | Min, Max           | 0.0957, 17.63     | 0.119, 24.288     | 0, 0.0848        | 0, 0.5832        | 0.0144, 1.173    |
|                                                      | Palifermin | Mean (SD)          | 6.0763 (4.4641)   | 4.9027 (4.6015)   | 0.0424 (0.0432)  | 0.0986 (0.0913)  | 0.2615 (0.3478)  |
|                                                      |            | Median             | 4.6126            | 2.632             | 0.028            | 0.089            | 0.2198           |
|                                                      |            | Min, Max           | 1.292, 17.44      | 0.8835, 15.618    | 0, 0.112         | 0.0063, 0.316    | 0.0228, 1.408    |
| % of CD8 that are EM (CCR7-CD45RA-)                  | Placebo    | Mean (SD)          | 21.2 ( 9.16)      | 26.1 (10.81)      | 59.9 (25.13)     | 45.1 (20.70)     | 27.3 (15.28)     |
|                                                      |            | Median             | 21.95             | 23.4              | 70.95            | 48.95            | 25.05            |
|                                                      |            | Min, Max           | 1.71, 35.1        | 0.73, 39.8        | 1.93, 89.8       | 2.11, 73.5       | 2.67, 65.1       |
|                                                      | Palifermin | Mean (SD)          | 28.3 ( 8.75)      | 28.2 (10.87)      | 58.9 (22.80)     | 38.9 (16.67)     | 30.9 (17.17)     |
|                                                      |            | Median             | 29.3              | 27.7              | 65.6             | 40.65            | 28.75            |
|                                                      |            | Min, Max           | 12.6, 43.5        | 12.9, 44.5        | 17.2, 86.1       | 5.31, 70.9       | 1.65, 77.5       |

|                                                                   |            |           |                |                |              |               |               |
|-------------------------------------------------------------------|------------|-----------|----------------|----------------|--------------|---------------|---------------|
| <b>EM CD8 (CCR7-CD45RA-)<br/>count (x10<sup>7</sup>/L)</b>        | Placebo    | Mean (SD) | 19.08 ( 8.81)  | 25.02 (10.76)  | 2.65 ( 2.65) | 3.26 ( 1.80)  | 3.88 ( 1.80)  |
|                                                                   |            | Median    | 19.267         | 25.651         | 2.1255       | 2.587         | 4.3845        |
|                                                                   |            | Min, Max  | 0.9063, 31.35  | 0.511, 45.126  | 0, 7.882     | 0.0633, 6.708 | 0.1602, 5.89  |
|                                                                   | Palifermin | Mean (SD) | 23.41 (12.42)  | 25.99 (18.73)  | 5.39 (11.81) | 2.58 ( 1.16)  | 2.92 ( 1.69)  |
|                                                                   |            | Median    | 21.213         | 18.96          | 1.0355       | 2.149         | 2.551         |
|                                                                   |            | Min, Max  | 4.788, 46.644  | 5.88, 76.734   | 0, 34.506    | 1.38, 5.174   | 0.297, 6.975  |
| <b>% of CD8 that are<br/>TEMRA (CCR7-CD45RA+)</b>                 | Placebo    | Mean (SD) | 20.7 (16.9)    | 21.6 (13.1)    | 30.8 (24.8)  | 33.9 (24.0)   | 32.4 (21.8)   |
|                                                                   |            | Median    | 13.95          | 16.6           | 21.6         | 31.1          | 21.6          |
|                                                                   |            | Min, Max  | 2.64, 59.7     | 6.74, 49.9     | 6.42, 94.3   | 6.05, 86.7    | 6.26, 72.2    |
|                                                                   | Palifermin | Mean (SD) | 19.9 (17.4)    | 26.0 (18.7)    | 37.2 (23.9)  | 46.2 (25.1)   | 42.4 (27.7)   |
|                                                                   |            | Median    | 14.55          | 20             | 28.7         | 49.1          | 38.6          |
|                                                                   |            | Min, Max  | 4.48, 66.2     | 5.3, 69.9      | 10.9, 82.8   | 5.28, 94.5    | 11, 97.6      |
| <b>TEMRA CD8<br/>(CCR7+CD45RA+) count<br/>(x10<sup>7</sup>/L)</b> | Placebo    | Mean (SD) | 19.59 (18.21)  | 23.13 (20.17)  | 2.08 ( 2.70) | 2.86 ( 3.04)  | 4.93 ( 4.69)  |
|                                                                   |            | Median    | 13.61          | 12.5718        | 1.3385       | 1.6805        | 3.3155        |
|                                                                   |            | Min, Max  | 1.2144, 65.67  | 4.9876, 70.723 | 0, 7.904     | 0.2652, 10.8  | 0.626, 16.709 |
|                                                                   | Palifermin | Mean (SD) | 13.21 ( 7.55)  | 18.89 ( 9.83)  | 2.80 ( 6.71) | 5.87 ( 9.31)  | 5.25 ( 6.19)  |
|                                                                   |            | Median    | 15.0695        | 17             | 0.6205       | 2.553         | 2.44          |
|                                                                   |            | Min, Max  | 3.1746, 25.179 | 4.908, 33.858  | 0, 19.386    | 0.264, 33.075 | 0.88, 20.275  |

**Supplemental Table 6:** Characterisation of the CD8 population into naïve (CD45RA+CCR7+), central memory (CD45RA-CCR7+), effector memory (CD45RA-CCR7-) and TEMRA (CD45RA+CCR7-) subsets. Data show either cell subset count or percentage of the total CD4+ T cell population. Data show: mean (SD), median and minimum and maximum values.

| Variable                                   | Group      | Statistic          | Screening       | Baseline        | M1              | M3              | M6              |
|--------------------------------------------|------------|--------------------|-----------------|-----------------|-----------------|-----------------|-----------------|
| Sample Numbers                             | Placebo    | Total Cell count n | 14              | 14              | 10              | 14              | 14              |
|                                            | Palifermin |                    | 14              | 14              | 8               | 14              | 14              |
|                                            | Placebo    | % count n          | 14              | 13              | 14              | 14              | 14              |
|                                            | Palifermin |                    | 14              | 13              | 14              | 14              | 14              |
|                                            | Placebo    | Subset count n     | 14              | 13              | 10              | 14              | 14              |
|                                            | Palifermin |                    | 14              | 13              | 8               | 14              | 14              |
| % of CD4 that are Treg                     | Placebo    | Mean (SD)          | 5.49 ( 2.03)    | 6.58 ( 1.60)    | 16.02 (10.70)   | 15.25 ( 7.13)   | 12.31 ( 6.69)   |
|                                            |            | Median             | 6.14            | 6.86            | 17.235          | 15.655          | 11.155          |
|                                            |            | Min, Max           | 0.968, 7.57     | 3.18, 9.34      | 0.799, 35.75    | 0.98, 31.64     | 3.49, 31.29     |
|                                            | Palifermin | Mean (SD)          | 5.57 ( 2.27)    | 6.48 ( 1.75)    | 13.64 (11.96)   | 16.31 ( 9.88)   | 13.61 ( 5.11)   |
|                                            |            | Median             | 5.32            | 6.29            | 9.02            | 14.505          | 14.845          |
|                                            |            | Min, Max           | 1.37, 9.95      | 4.26, 10.47     | 1.167, 34.27    | 2.73, 40.04     | 4.76, 21.43     |
| Total Treg count<br>(x10 <sup>7</sup> /L)  | Placebo    | Mean (SD)          | 4.815 (2.290)   | 6.330 (2.656)   | 0.401 (0.338)   | 1.058 (0.643)   | 1.644 (0.740)   |
|                                            |            | Median             | 4.75325         | 5.321           | 0.39995         | 0.87735         | 1.5665          |
|                                            |            | Min, Max           | 0.85184, 8.9326 | 3.7524, 13.5142 | 0, 1.0535       | 0.0784, 2.28    | 0.6282, 3.2147  |
|                                            | Palifermin | Mean (SD)          | 4.249 (1.877)   | 5.443 (2.057)   | 0.292 (0.242)   | 1.058 (0.488)   | 1.285 (0.525)   |
|                                            |            | Median             | 4.1357          | 5.3056          | 0.30185         | 1.0815          | 1.1866          |
|                                            |            | Min, Max           | 0.9042, 7.1484  | 1.7892, 9.6918  | 0, 0.63018      | 0.3582, 2.002   | 0.7524, 2.7344  |
| naïve Treg count<br>(x10 <sup>7</sup> /L)  | Placebo    | Mean (SD)          | 1.9995 (1.0568) | 2.7099 (1.8087) | 0.0560 (0.0665) | 0.0479 (0.0377) | 0.2884 (0.2075) |
|                                            |            | Median             | 1.80205         | 1.989           | 0.02213         | 0.03875         | 0.23285         |
|                                            |            | Min, Max           | 0.6478, 3.9648  | 0.8296, 7.3481  | 0, 0.2035       | 0.007, 0.1128   | 0.0133, 0.7936  |
|                                            | Palifermin | Mean (SD)          | 1.7191 (1.1470) | 1.7381 (0.8446) | 0.0123 (0.0167) | 0.0756 (0.0999) | 0.1873 (0.2265) |
|                                            |            | Median             | 1.5664          | 1.653           | 0.00925         | 0.0347          | 0.1215          |
|                                            |            | Min, Max           | 0.3154, 4.1322  | 0.35, 3.393     | 0, 0.05238      | 0, 0.35         | 0.0264, 0.9104  |
| Memory Treg count<br>(x10 <sup>7</sup> /L) | Placebo    | Mean (SD)          | 2.815 (1.499)   | 3.620 (1.396)   | 0.345 (0.278)   | 1.010 (0.632)   | 1.355 (0.666)   |
|                                            |            | Median             | 2.84755         | 3.332           | 0.3735          | 0.8564          | 1.176           |
|                                            |            | Min, Max           | 0.08624, 5.31   | 1.015, 6.1661   | 0, 0.85         | 0.036, 2.175    | 0.3006, 2.4211  |
|                                            | Palifermin | Mean (SD)          | 2.530 (1.185)   | 3.705 (1.536)   | 0.279 (0.231)   | 0.983 (0.480)   | 1.098 (0.397)   |
|                                            |            | Median             | 2.46805         | 3.3145          | 0.2943          | 1.0115          | 1.049           |
|                                            |            | Min, Max           | 0.2442, 4.4175  | 1.2054, 6.2988  | 0, 0.586        | 0.351, 1.83     | 0.5994, 1.824   |

**Supplemental Table 7:** Characterisation of the CD4+ Treg (CD25hiCD127lo) population. Data show: n, mean (SD), median, minimum and maximum values (range).

| Variable       | Group      | Statistic | Screening      | M6             |
|----------------|------------|-----------|----------------|----------------|
| Thymic volume  | Placebo    | n         | 14             | 14             |
|                |            | Mean (SD) | 8.4 (6.51)     | 9.1 (7.45)     |
|                |            | Median    | 8.425          | 7.305          |
|                |            | Min, Max  | 0.35, 21.33    | 0.35, 21.82    |
| Thymic volume  | Palifermin | n         | 14             | 14             |
|                |            | Mean (SD) | 10.2 (7.41)    | 10.6 (7.73)    |
|                |            | Median    | 9.325          | 10.135         |
|                |            | Min, Max  | 0.35, 24.58    | 0.35, 23.55    |
| Thymic density | Placebo    | n         | 13             | 13             |
|                |            | Mean (SD) | -2.615 (29.5)  | -0.615 (25.3)  |
|                |            | Median    | 9              | -5             |
|                |            | Min, Max  | -53, 30        | -42, 34        |
| Thymic density | Palifermin | n         | 12             | 12             |
|                |            | Mean (SD) | -22.167 (41.2) | -26.500 (40.4) |
|                |            | Median    | -15            | -27.5          |
|                |            | Min, Max  | -82, 41        | -81, 37        |

**Supplemental Table 8:** Thymic size and density. Data show: n, mean (SD), median, minimum and maximum values (range).

| Variable                                                   | Group       | Statistic | Baseline          | M1                | M3               | M6               |
|------------------------------------------------------------|-------------|-----------|-------------------|-------------------|------------------|------------------|
| Sample Numbers                                             | Low dose    | n         | 2                 | 3                 | 2                | 2                |
|                                                            | Median dose |           | 3                 | 3                 | 3                | 3                |
|                                                            | High doses  |           | 3                 | 2                 | 3                | 3                |
| Total CD4 Count<br>(x10 <sup>9</sup> /L)                   | 90mcg/Kg    | Mean (SD) | 0.870 (0.270)     | 0.065 (0.099)     | 0.130 (0.130)    | 0.127 (0.050)    |
|                                                            |             | Median    | 0.740             | 0.010             | 0.060            | 0.120            |
|                                                            |             | Min, Max  | 0.69, 1.18        | 0.006, 0.18       | 0.05, 0.28       | 0.08, 0.18       |
|                                                            | 120mcg/Kg   | Mean (SD) | 1.043 (0.463)     | 0.006 (0.00)      | 0.077 (0.046)    | 0.087 (0.064)    |
|                                                            |             | Median    | 1.140             | 0.006             | 0.050            | 0.060            |
|                                                            |             | Min, Max  | 0.54, 1.45        | 0.006, 0.006      | 0.05, 0.13       | 0.04, 0.16       |
|                                                            | 180 mcg/Kg  | Mean (SD) | 0.88 (0.352)      | 0.024 (0.031)     | 0.039 (0.029)    | 0.057 (0.015)    |
|                                                            |             | Median    | 0.920             | 0.006             | 0.050            | 0.060            |
|                                                            |             | Min, Max  | 0.51, 1.210       | 0.006, 0.060      | 0.006, 0.060     | 0.04, 0.070      |
| % of CD4 that are naïve<br>(CCR7+CD45RA+)                  | 90mcg/Kg    | Mean (SD) | 44.65 (0.495)     | 3.55 (2.686)      | 1.62 (0.877)     | 23.45 (11.950)   |
|                                                            |             | Median    | 44.650            | 5.020             | 1.620            | 23.450           |
|                                                            |             | Min, Max  | 44.3, 45.00       | 0.45, 5.180       | 1.00, 2.240      | 15.0, 31.90      |
|                                                            | 120mcg/Kg   | Mean (SD) | 37.8 (16.441)     | 2.617 (2.724)     | 4.19 (2.745)     | 7.587 (8.325)    |
|                                                            |             | Median    | 45.700            | 1.820             | 2.820            | 2.810            |
|                                                            |             | Min, Max  | 18.9, 48.80       | 0.38, 5.65        | 2.4, 2.35        | 2.75, 17.20      |
|                                                            | 180mcg/Kg   | Mean (SD) | 30.567 (6.527)    | 1.575 (0.134)     | 7.83 (3.189)     | 10.963 (9.595)   |
|                                                            |             | Median    | 27.000            | 1.575             | 8.230            | 7.540            |
|                                                            |             | Min, Max  | 26.6, 38.10       | 1.48, 1.670       | 4.46, 10.80      | 3.55, 21.80      |
| Naïve CD4<br>(CCR7+CD45RA+) count<br>(x10 <sup>7</sup> /L) | 90mcg/Kg    | Mean (SD) | 42.787 (13.42)    | 0.05492 (0.02467) | 0.2072 (0.1296)  | 2.176 (0.5317)   |
|                                                            |             | Median    | 42.787            | 0.0518            | 0.2072           | 2.176            |
|                                                            |             | Min, Max  | 33.3, 52.274      | 0.031947, 0.081   | 0.1344, 0.28     | 1.8, 2.552       |
|                                                            | 120mcg/Kg   | Mean (SD) | 44.3547 (31.0107) | 0.01665 (0.01733) | 0.2847 (0.14264) | 0.52813 (0.4661) |
|                                                            |             | Median    | 52.098            | 0.011582          | 0.3666           | 0.44             |
|                                                            |             | Min, Max  | 10.206, 70.76     | 0.00242, 0.03596  | 0.12, 0.3675     | 0.1124, 1.032    |
|                                                            | 180mcg/Kg   | Mean (SD) | 28.114 (16.470)   | 0.04971 (0.05528) | 0.26184 (0.2152) | 0.5376 (0.3296)  |
|                                                            |             | Median    | 24.472            | 0.04971           | 0.223            | 0.5278           |
|                                                            |             | Min, Max  | 13.77, 46.101     | 0.01063, 0.0888   | 0.0687, 0.4938   | 0.213, 0.872     |

**Supplemental Table 9:** Dose tolerability sub-study CD4 results - characterisation into naïve (CD45RA+CCR7+), central memory (CD45RA-CCR7+), effector memory (CD45RA-CCR7-) and TEMRA (CD45RA+CCR7-) subsets. Data show either cell subset count or percentage of the total CD4+ T cell population. Data show: mean (SD), median and minimum and maximum values.

| Variable                  | Group       | Statistic                       | Baseline                                          | M6                                              |
|---------------------------|-------------|---------------------------------|---------------------------------------------------|-------------------------------------------------|
| Sample Numbers            | Low dose    | n                               | 3                                                 | 3                                               |
|                           | Median dose |                                 | 3                                                 | 3                                               |
|                           | High doses  |                                 | 3                                                 | 3                                               |
| TRECS/mL                  | 90mcg/Kg    | Mean (SD)<br>Median<br>Min, Max | 8855·98 (5048·31)<br>8601·87<br>3939·52, 14026·54 | 1590·20 (1104·48)<br>1428·48<br>575·50, 2766·63 |
|                           | 120mcg/Kg   | Mean (SD)<br>Median<br>Min, Max | 4027·24 (2920·84)<br>5226·54<br>697·65, 6157·54   | 295·11(258·64)<br>193·75<br>102·51, 589·08      |
|                           | 180 mcg/Kg  | Mean (SD)<br>Median<br>Min, Max | 3050·29 (1162·30)<br>2863·32<br>1992·81, 4294·75  | 274·86 (225·87)<br>159·63<br>129·85, 535·10     |
| TRECS/mL as % of baseline | 90mcg/Kg    | Mean (SD)<br>Median<br>Min, Max | -                                                 | 20·89 (14·82)<br>19·72<br>6·69, 36·26           |
|                           | 120mcg/Kg   | Mean (SD)<br>Median<br>Min, Max | -                                                 | 13·57 (13·20)<br>11·27<br>1·66, 27·77           |
|                           | 180 mcg/Kg  | Mean (SD)<br>Median<br>Min, Max | -                                                 | 9·64 (7·96)<br>6·52<br>3·72, 18·69              |

**Supplemental Table 10:** Dose-tolerability sub-study T-cell receptor circles (TRECs)/mL of blood results. Data show: n, mean (SD), median, minimum and maximum values (range).

|                                                                               |                                   | 90cg/kg/day | 120mcg/kg/day | 180mcg/kg/day |
|-------------------------------------------------------------------------------|-----------------------------------|-------------|---------------|---------------|
| <b>Infusion-associated symptoms occurring at baseline</b>                     | Erythematous skin rash            | 3           | 3             | 3             |
|                                                                               | Oral symptoms                     | 3           | 3             | 3             |
|                                                                               | Oedema (facial/hands)             | 1           | 3             | 3             |
|                                                                               | Urticarial skin rash              | 1           | 0             | 2             |
|                                                                               | Discoloured tongue                | 3           | 3             | 3             |
|                                                                               | Pyrexia                           | 3           | 2             | 1             |
|                                                                               | Headache                          | 2           | 0             | 2             |
|                                                                               | Skin sensitivity                  | 0           | 0             | 2             |
|                                                                               | Fatigue                           | 0           | 0             | 1             |
|                                                                               | Chest tightness                   | 2           | 0             | 1             |
|                                                                               | GI upset                          | 1           | 1             | 2             |
| <b>Infusion-associated symptoms occurring with IMP at month 1 and month 3</b> | Erythematous skin rash            | 2           | 3             | 2             |
|                                                                               | Oral symptoms                     | 3           | 3             | 3             |
|                                                                               | Oedema (facial/hands)             | 3           | 3             | 3             |
|                                                                               | Discoloured tongue                | 3           | 3             | 3             |
|                                                                               | Skin sensitivity                  | 0           | 0             | 1             |
|                                                                               | Peeling skin                      | 0           | 1             | 0             |
|                                                                               | Pyrexia                           | 1           | 1             | 0             |
|                                                                               | GI upset                          | 1           | 0             | 1             |
| <b>AEs unrelated to infusions</b>                                             | Hair loss                         | 1           | 1             | 2             |
|                                                                               | Dry skin                          | 2           | 1             | 2             |
|                                                                               | Nail changes (ridging)            | 1           | 0             | 1             |
|                                                                               | Upper respiratory tract infection | 2           | 0             | 1             |
|                                                                               | Fatigue                           | 1           | 0             | 0             |
|                                                                               | Low mood                          | 1           | 1             | 0             |

**Supplemental Table 11:** Adverse event data for sub-study patients only. The data is broken down by the daily dose of Palifermin given (adverse event data for those in the main study, all of whom were treated with 180mcg/kg/day, are shown in table 2). Data are incidence (n). All events were categorised as either severity grade 1 or 2.
